# Supplementary material
Source: PubMed Central journal article supplement (PMC520968)
Supplement: plntcell_tpc.104.026070_2.pdf [file plntcell_tpc.104.026070_2.pdf]

**Table 1 (supplement)**

| <b>Fatty acid</b>     | <b>Neutrallipids</b> |                   | <b>Phospholipids</b> |                   | <b>Glycolipids</b> |                   |
|-----------------------|----------------------|-------------------|----------------------|-------------------|--------------------|-------------------|
|                       | <b>Wt</b>            | <b>Transgenic</b> | <b>Wt</b>            | <b>Transgenic</b> | <b>Wt</b>          | <b>Transgenic</b> |
| 16:0                  | <b>6.3</b>           | <b>7.3</b>        | <b>17.1</b>          | <b>17.9</b>       | <b>10.2</b>        | <b>14.1</b>       |
| 18:0                  | <b>3.8</b>           | <b>3.3</b>        | <b>4.7</b>           | <b>4.5</b>        | <b>4.0</b>         | <b>4.4</b>        |
| 18:1 <sup>Δ9</sup>    | <b>32.0</b>          | <b>20.1</b>       | <b>34.8</b>          | <b>26.0</b>       | <b>17.5</b>        | <b>13.6</b>       |
| 18:2 <sup>Δ9,12</sup> | <b>11.5</b>          | <b>4.8</b>        | <b>17.8</b>          | <b>12.5</b>       | <b>18.9</b>        | <b>17.5</b>       |
| <b>γ-18:3</b>         | -                    | <b>15.9</b>       | -                    | <b>11.6</b>       | -                  | <b>13.0</b>       |
| <b>α-18:3</b>         | <b>46.3</b>          | <b>28.4</b>       | <b>25.6</b>          | <b>13.0</b>       | <b>49.4</b>        | <b>32.4</b>       |
| <b>18:4</b>           | -                    | <b>12.0</b>       | -                    | <b>3.5</b>        | -                  | <b>3.0</b>        |
| <b>ω6-20:3</b>        | -                    | <b>3.2</b>        | -                    | <b>5.4</b>        | -                  | <b>1.2</b>        |
| <b>ω6-20:4</b>        | -                    | <b>1.8</b>        | -                    | <b>4.5</b>        | -                  | <b>0.7</b>        |
| <b>ω3-20:4</b>        | -                    | <b>2.3</b>        | -                    | <b>0.8</b>        | -                  | -                 |
| <b>ω3-20:5</b>        | -                    | <b>0.8</b>        | -                    | <b>0.4</b>        | -                  | -                 |
