# Supplementary material
Source: PubMed Central journal article supplement (PMC520968)
Supplement: plntcell_tpc.104.026070_3.pdf [file plntcell_tpc.104.026070_3.pdf]

## Table 2 (supplement)

| Mass of<br>[M+H] <sup>+</sup> | PC<br>species <sup>a</sup> | mol%<br>(average) | (st.<br>dev.) | Acyl species<br>(most<br>abundant) | Acyl<br>species<br>(2nd most<br>abundant) | Acyl species<br>(3rd most<br>abundant) | Acyl species<br>(4th most<br>abundant) | Acyl species<br>(5th most<br>abundant) |
|-------------------------------|----------------------------|-------------------|---------------|------------------------------------|-------------------------------------------|----------------------------------------|----------------------------------------|----------------------------------------|
| 728                           | 32:3                       | 0.09              | 0.00          |                                    |                                           |                                        |                                        |                                        |
| 730                           | 32:2                       | 0.07              | 0.00          |                                    |                                           |                                        |                                        |                                        |
| 732                           | 32:1                       | 0.22              | 0.00          |                                    |                                           |                                        |                                        |                                        |
| 734                           | 32:0                       | 0.10              | 0.00          |                                    |                                           |                                        |                                        |                                        |
| 754                           | 34:4                       | 1.47              | 0.02          | 16:0-18:4 <sup>b</sup>             | 16:1-18:3 <sup>b</sup>                    | 16:2-18:2 <sup>b</sup>                 |                                        |                                        |
| 756                           | 34:3                       | 8.34              | 0.08          | 16:0-18:3 <sup>b</sup>             | 16:1-18:2 <sup>b</sup>                    |                                        |                                        |                                        |
| 758                           | 34:2                       | 5.10              | 0.02          | 16:0-18:2 <sup>b</sup>             | 16:1-18:1 <sup>b</sup>                    |                                        |                                        |                                        |
| 760                           | 34:1                       | 6.95              | 0.06          | 16:0-18:1 <sup>b</sup>             |                                           |                                        |                                        |                                        |
| 776                           | 36:7                       | 1.19              | 0.01          | 18:3-18:4                          | 16:0-(297) <sup>bc</sup>                  |                                        |                                        |                                        |
| 778                           | 36:6                       | 5.56              | 0.02          | 18:3-18:3                          | 18:2-18:4                                 |                                        |                                        |                                        |
| 780                           | 36:5                       | 10.15             | 0.03          | 18:3-18:2                          | 18:1-18:4                                 |                                        |                                        |                                        |
| 782                           | 36:4                       | 19.86             | 0.10          | 18:3-18:1                          | 18:2-18:2                                 | 16:0-20:4 <sup>b</sup>                 | 18:0-18:4 <sup>b</sup>                 |                                        |
| 784                           | 36:3                       | 12.64             | 0.02          | 18:2-18:1                          | 18:0-18:3 <sup>b</sup>                    | 16:0-20:3 <sup>b</sup>                 |                                        |                                        |
| 786                           | 36:2                       | 12.74             | 0.04          | 18:1-18:1                          | 18:0-18:2 <sup>b</sup>                    |                                        |                                        |                                        |
| 788                           | 36:1                       | 1.33              | 0.03          | 18:0-18:1                          |                                           |                                        |                                        |                                        |
| 790                           | 36:0                       | 0.13              | 0.00          | 18:0-18:0                          |                                           |                                        |                                        |                                        |
| 792                           | 37:6                       | 0.03              | 0.00          |                                    |                                           |                                        |                                        |                                        |
| 794                           | 37:5                       | 0.07              | 0.00          | (293)-18:3 <sup>bc</sup>           |                                           |                                        |                                        |                                        |
| 800                           | 38:9                       | 0.17              | 0.00          |                                    |                                           |                                        |                                        |                                        |
| 802                           | 38:8                       | 0.31              | 0.01          | (297)-18:1 <sup>bc</sup>           | 18:3-20:5                                 | 18:4-20:4 <sup>b</sup>                 | (295)-18:0 <sup>c</sup>                |                                        |
| 804                           | 38:7                       | 2.11              | 0.02          | 18:3-20:4                          | 18:4-20:3                                 |                                        |                                        |                                        |
| 806                           | 38:6                       | 3.69              | 0.07          | 20:3-18:3 <sup>b</sup>             | 18:2-20:4 <sup>b</sup>                    | 18:1-20:5 <sup>b</sup>                 |                                        |                                        |
| 808                           | 38:5                       | 3.58              | 0.04          | 18:1-20:4 <sup>b</sup>             | 18:2-20:3                                 | 20:2-18:3 <sup>b</sup>                 |                                        |                                        |
| 810                           | 38:4                       | 2.21              | 0.03          | 18:1-20:3                          | 18:0-20:4 <sup>b</sup>                    | 18:2-20:2                              | 20:1-18:3 <sup>b</sup>                 | 20:0-18:4 <sup>b</sup>                 |
| 812                           | 38:3                       | 0.41              | 0.01          |                                    |                                           |                                        |                                        |                                        |
| 814                           | 38:2                       | 0.08              | 0.01          |                                    |                                           |                                        |                                        |                                        |
| 816                           | 38:1                       | 0.07              | 0.00          |                                    |                                           |                                        |                                        |                                        |
| 818                           | 38:0                       | 0.02              | 0.00          |                                    |                                           |                                        |                                        |                                        |
| 828                           | 40:9                       | 0.05              | 0.00          |                                    |                                           |                                        |                                        |                                        |
| 830                           | 40:8                       | 0.18              | 0.00          | 20:4-20:4                          |                                           |                                        |                                        |                                        |
| 832                           | 40:7                       | 0.39              | 0.01          | 20:3-20:4                          |                                           |                                        |                                        |                                        |
| 834                           | 40:6                       | 0.14              | 0.00          |                                    |                                           |                                        |                                        |                                        |
| 836                           | 40:5                       | 0.08              | 0.00          |                                    |                                           |                                        |                                        |                                        |
| 838                           | 40:4                       | 0.06              | 0.00          |                                    |                                           |                                        |                                        |                                        |
| 840                           | 40:3                       | 0.06              | 0.00          |                                    |                                           |                                        |                                        |                                        |
| 842                           | 40:2                       | 0.04              | 0.00          |                                    |                                           |                                        |                                        |                                        |
| 858                           | 42:8                       | 0.05              | 0.00          |                                    |                                           |                                        |                                        |                                        |
| 860                           | 42:7                       | 0.02              | 0.00          |                                    |                                           |                                        |                                        |                                        |
| 862                           | 42:6                       | 0.02              | 0.00          |                                    |                                           |                                        |                                        |                                        |
| 864                           | 42:5                       | 0.02              | 0.00          |                                    |                                           |                                        |                                        |                                        |
| 866                           | 42:4                       | 0.04              | 0.00          |                                    |                                           |                                        |                                        |                                        |
| 868                           | 42:3                       | 0.08              | 0.00          | 24:0-18:3 <sup>b</sup>             |                                           |                                        |                                        |                                        |
| 870                           | 42:2                       | 0.04              | 0.00          |                                    |                                           |                                        |                                        |                                        |
| 872                           | 42:1                       | 0.04              | 0.00          |                                    |                                           |                                        |                                        |                                        |
