# Supplementary material
Source: PubMed Central journal article supplement (PMC520968)

**Figure 1 (supplement)**

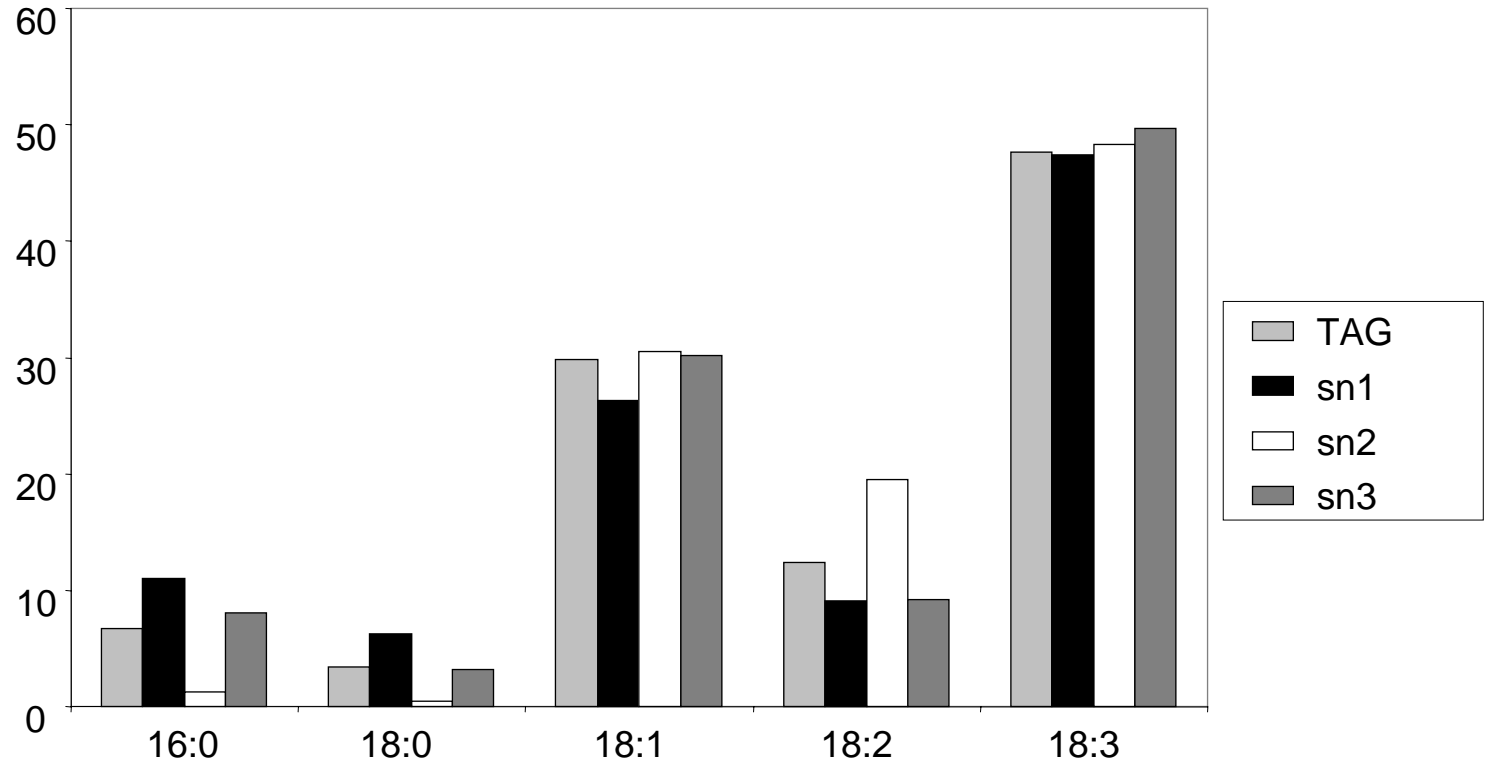

Supplement: plntcell_tpc.104.026070_1.pdf [file plntcell_tpc.104.026070_1.pdf]
